# Supplementary material for: Early Gnathostome Phylogeny Revisited: Multiple Method Consensus
Source: PubMed Central journal article supplement (PMC5029804; doi:10.1371/journal.pone.0163157), 2016-09-20
Supplement: pone.0163157.s006.pdf [file pone.0163157.s006.pdf]

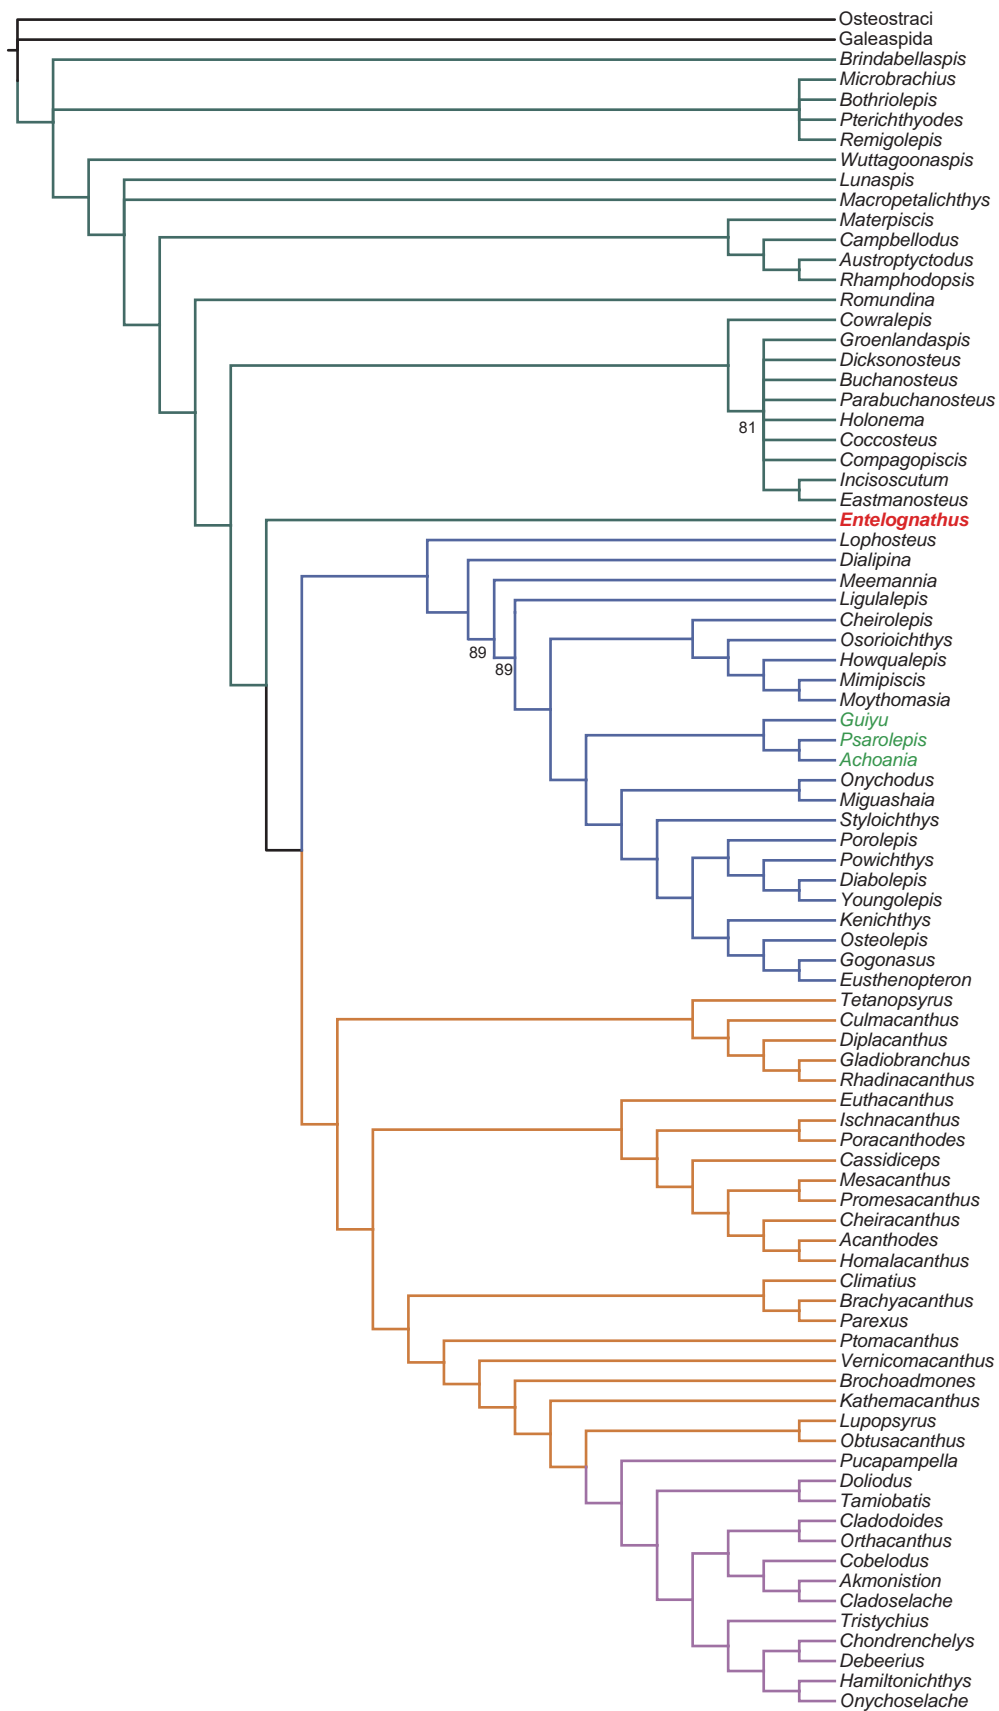

Figure S2. The 50% majority consensus tree of 36 most parsimonious trees based on the dataset revised from Long et al. (2015) (85 taxa). Numbers on branches indicate the percentage of most-parsimonious trees that contain a particular clade (100% unless otherwise indicated).
