# Supplementary material for: Early Gnathostome Phylogeny Revisited: Multiple Method Consensus
Source: PubMed Central journal article supplement (PMC5029804; doi:10.1371/journal.pone.0163157), 2016-09-20
Supplement: pone.0163157.s009.pdf [file pone.0163157.s009.pdf]

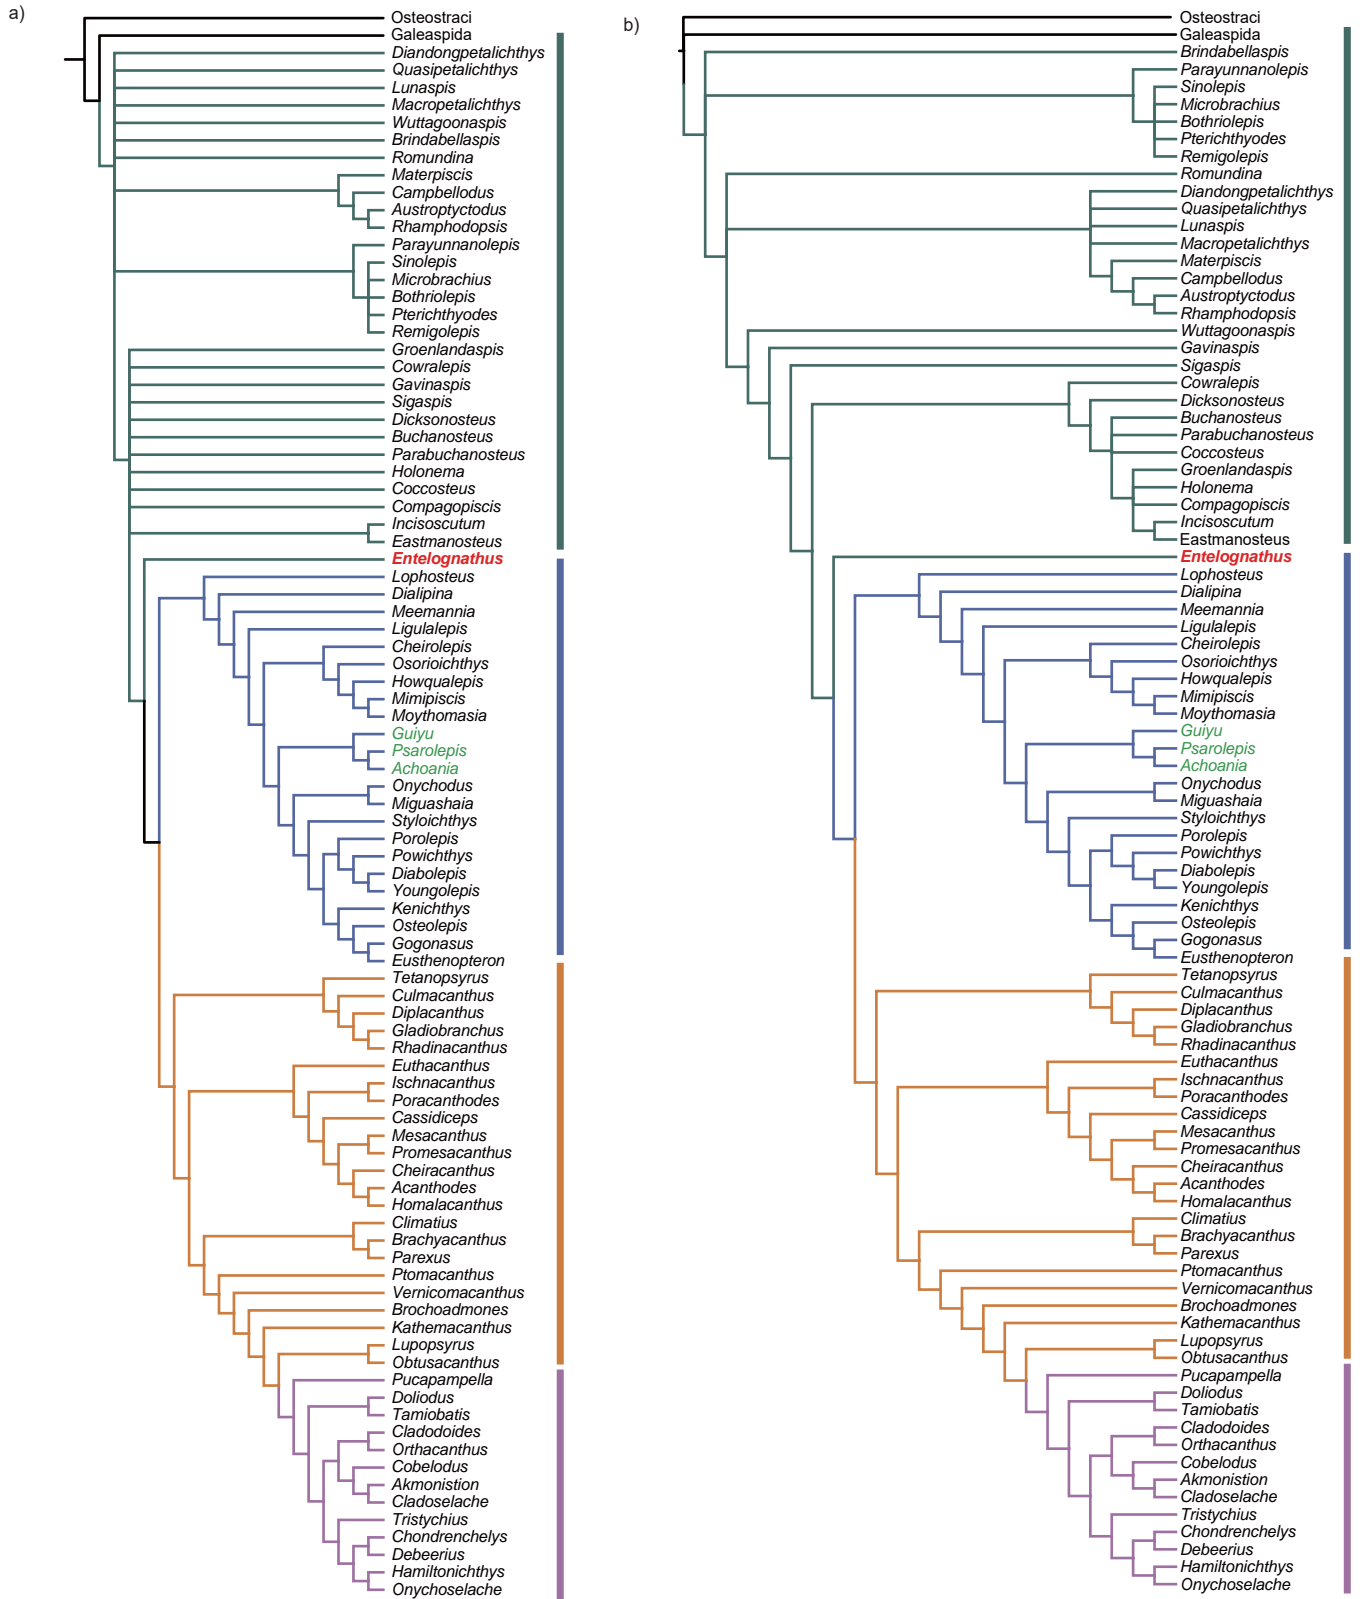

Figure S5. The strict consensus tree (a) and the 50% majority consensus tree (b) of 532 most parsimonious trees based on the dataset revised from Long et al. (2015) (total 91 taxa).
